# Supplementary material
Source: HighWire-hosted journal article supplement (https://bmjopen.bmj.com/content/9/5/e027016)
Supplement: inline-supplementary-material-1 [file inline-supplementary-material-1.pdf]

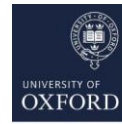

Principal Researcher: Filippo Bianchi  
Contact Details: RE-MAP@phc.ox.ac.uk  
Departmental web page: www.phc.ox.ac.uk  
Department's address: Nuffield Department of Primary Care health Sciences, Radcliffe Observatory  
Quarter, Woodstock Road, Oxford. OX2 6GG  
University web page: www.ox.ac.uk

**Participant ID:** \_\_\_\_\_

Replacing Meat with Alternative Protein Sources (RE-MAP STUDY)

Participant Consent Form. CUREC-Approval Reference: R54329/RE001

The purpose of this study is to test the effectiveness of a behavioural intervention designed to help people reduce their consumption of meat.

**Please initial the boxes to confirm you agree**

I confirm that I have read and understood the information sheet for the above study. I have had the opportunity to consider the information, ask questions and have had these answered satisfactorily.

I understand that my participation is voluntary and that I am free to withdraw at any time, without having to give any reason, and without any adverse consequences.

I understand that designated individuals may look at research data collected during the study where it is relevant to my taking part in this study. I give permission for these individuals to access my data.

I understand that this project has been reviewed by, and received ethics clearance through, the University of Oxford Central University Research Ethics Committee.

I understand who will have access to personal data provided, how the data will be stored, and what will happen to the data at the end of the project.

I understand that three finger prick blood samples will be taken from me during this study to measure blood cholesterol. I understand the procedure that will be used to carry out these analyses.

I understand this research will be written up as a student's thesis, I understand how personal data included in that thesis will be published and stored.

I understand that I may be quoted in an anonymous way in publications pertinent to this study and that I will *not* be identified personally in any of these publications.

I understand how to raise a concern or make a complaint.

I consent to being audio recorded.

I understand how audio recordings will be used in research outputs

I consent to take part in the above study.

Optional: Should I be allocated to the intervention group, I understand and consent for my name, address, telephone number, and selection of meat substitutes to be shared with Sainsbury's to carry out the food deliveries.

Optional: I agree for research data collected in this study to be given to researchers, including those working outside of the EU, to be used in other research studies. I understand that any data that leave the research group will be fully anonymised so that I cannot be identified.

\_\_\_\_\_  
Name of participant

\_\_\_\_\_  
Date

\_\_\_\_\_  
Signature

\_\_\_\_\_  
Name of person taking consent

\_\_\_\_\_  
Date

\_\_\_\_\_  
Signature
